# Supplementary material for: Validation of Pretreatment Methods for the In-Process Quantification of Foot-and-Mouth Disease Vaccine Antigens
Source: MDPI journal article supplement (doi:10.3390/vaccines9111361), 2021-11-19
Supplement: s1 [file s1]

## **Supplementary materials**

### **Title: Validation of pretreatment methods for the in-process quantification of foot-and-mouth disease vaccine antigens**

Ah-Young Kim, Sun Young Park, Sang Hyun Park, Jong Sook Jin, Eun-Sol Kim, Jae Young Kim, Jong-Hyeon Park and Young-Joon Ko\*

Animal and Plant Quarantine Agency, Gimcheon, Gyeonsangbuk-do 39660, Republic of Korea

\* Corresponding author: Young-Joon Ko

Center for FMD Vaccine Research, Animal and Plant Quarantine Agency, Gimcheon, Gyeonsangbuk-do 39660, Republic of Korea

Tel.: 82-54-912-0908/ Fax: 82-54-912-0890

E-mail: koyoungjoon@korea.kr

## **Inventory of Supplemental Information**

### **Supplemental Figures and Legends:**

- **Figure S1 (refers to Figure 1)**
- **Figure S2 (refers to Figure 2)**
- **Figure S3 (refers to Table 1)**
- **Figure S4 (refers to Table 2)**
- **Figure S5 (refers to Table 3)**
- **Figure S6 (refers to Table 4)**

## Supplemental figures and legends

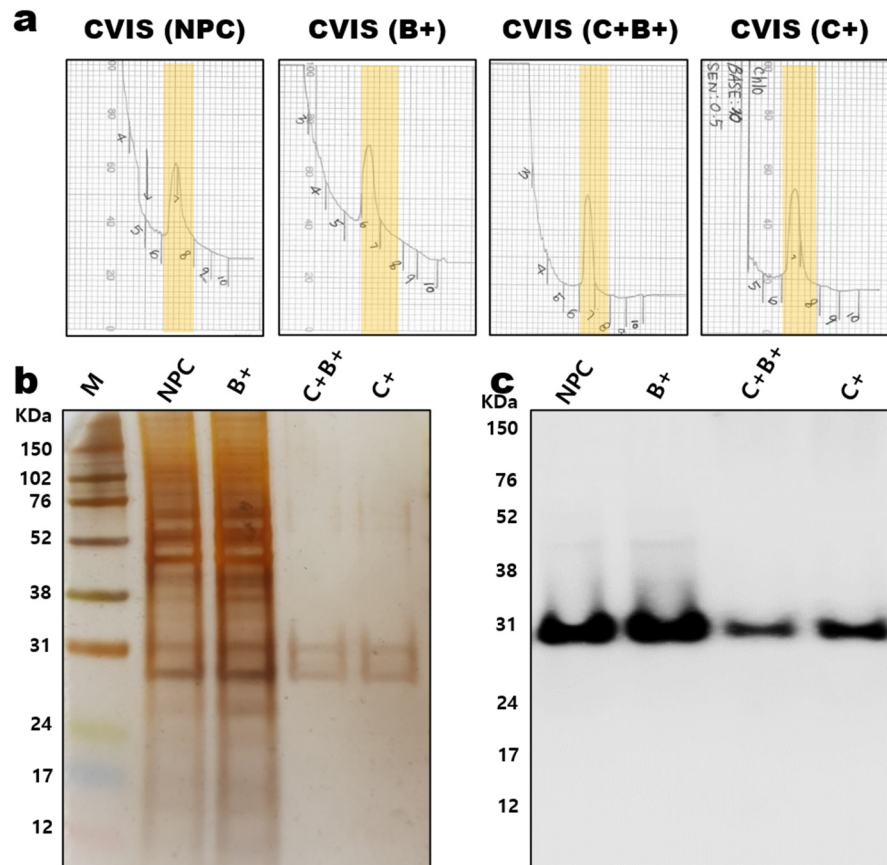

**Fig. S1. Purity of 146S antigen peak fractions collected by SDS fractionation from the 10 × concentrates for crude virus infection supernatant (CVIS) of FMDV O SKR/Boeun/2017.**

(a) Original chromatograms from SDS fractionation of CVIS (10×) dependent on each pretreatment method. Yellow backgrounds indicate the collected target peak fractions for further purity tests in b and c. (b) A silver-stained gel after SDS-PAGE of SDS ultracentrifugation target peak fraction dependent on each pretreatment method. (c) Western blot result against FMDV type O VP1 on SDS ultracentrifugation target peak fraction dependent on each pretreatment method.

Abbreviations: SDS, sucrose density gradient; NPC, non-pretreated control; B+, benzonase digestion; C+, chloroform extraction; C+B+, combinational pretreatment of chloroform and benzonase; M, marker.

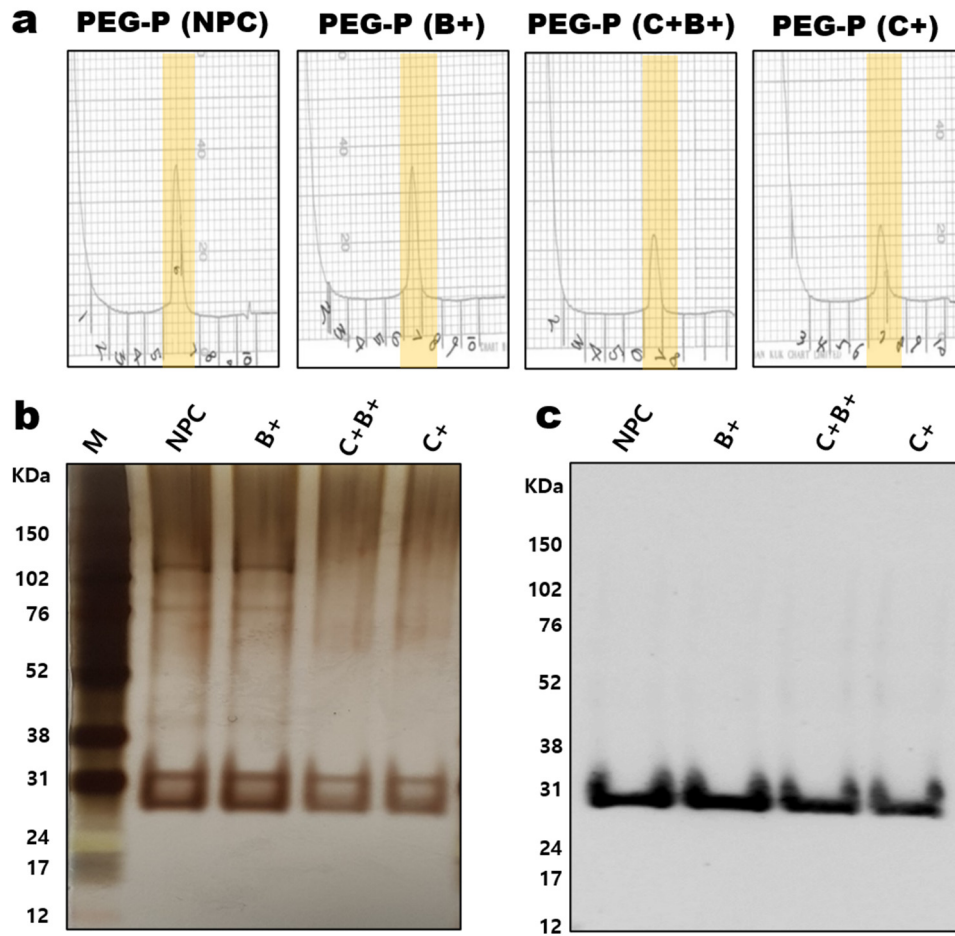

**Fig. S2. Purity of 146S antigen peak fractions collected by SDG fractionation from the 10× concentrates for PEG precipitate (PEG-P) of FMDV O SKR/Boeun/2017.**

(a) Original chromatograms from SDG fractionation of PEG-P (10×) dependent on each pretreatment method. Yellow backgrounds indicate the collected target peak fractions for further purity tests in B and C. (b) A silver-stained gel after SDS-PAGE of SDG ultracentrifugation target peak fraction dependent on each pretreatment method. (c) Western blot result against FMDV type O VP1 on SDG ultracentrifugation target peak fraction dependent on each pretreatment method.

Abbreviations: SDG, sucrose density gradient; NPC, non-pretreated control; B+, benzonase digestion; C+, chloroform extraction; C+B+, combinational pretreatment of chloroform and benzonase; M, marker.

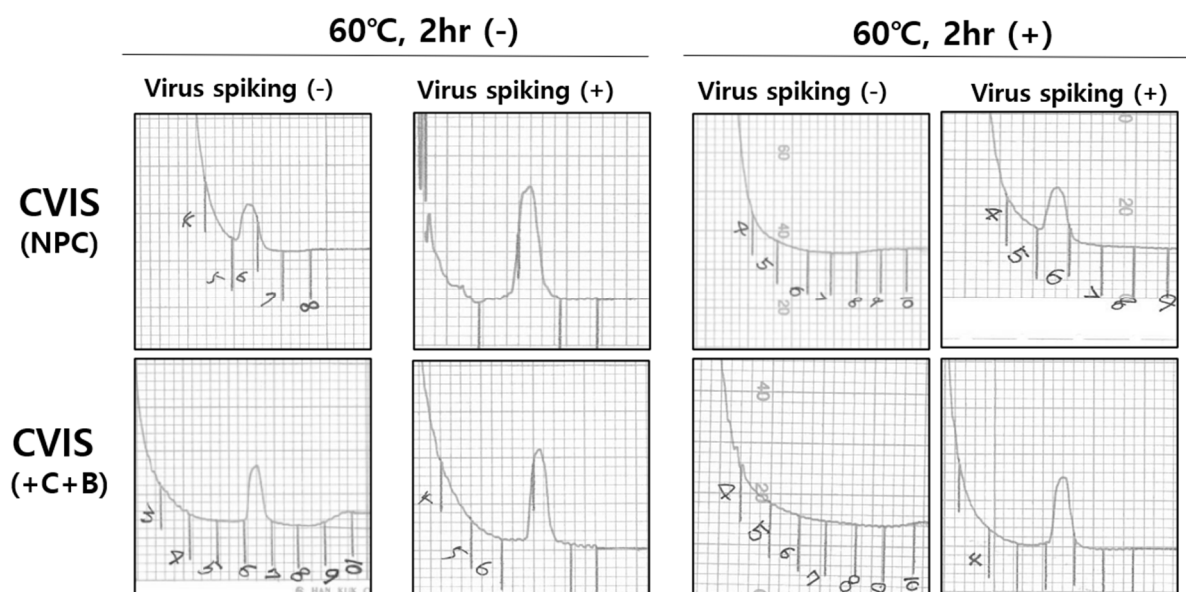

**Fig. S3. Representative original chromatograms drawn by SDG fractionation of CVIS (1×) with or without spiked 146S antigens.**

Abbreviations: CVIS, crude virus infection supernatant; SDG, sucrose density gradient; NPC, non-pretreated control; C+B+, combinational pretreatment of chloroform and benzonase.

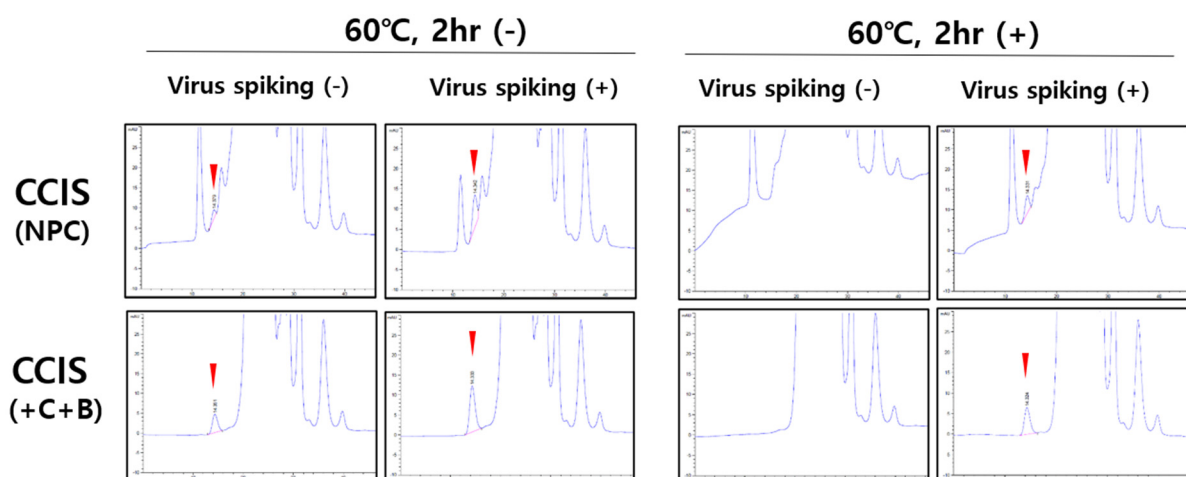

**Fig. S4. Representative original chromatograms drawn by SE- HPLC of CVIS (1×) with or without spiked 146S antigens. Red arrowheads indicate the FMDV 146S antigen peaks.**

Abbreviations: CVIS, crude virus infection supernatant; SE-HPLC, size-exclusion high-performance liquid chromatography; NPC, non-pretreated control; C+B+, combinational pretreatment of chloroform and benzonase.

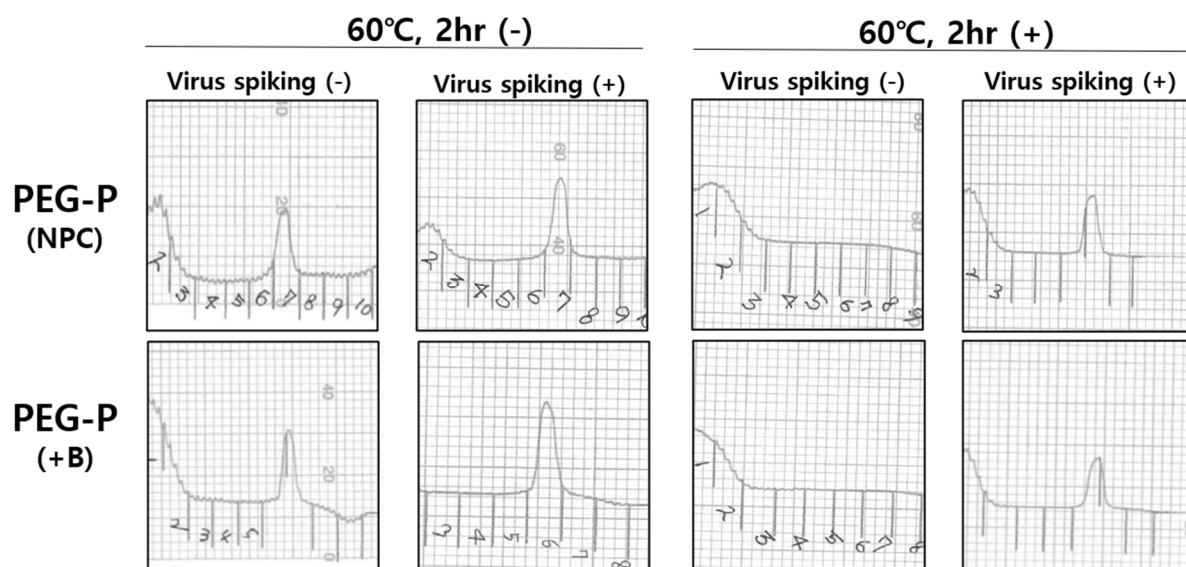

**Fig. S5. Representative original chromatograms drawn by SDG fractionation of PEG-P (1×) with or without spiked 146S antigens.**

Abbreviations: PEG-P, polyethylene glycol-precipitate; SDG, sucrose density gradient; NPC, non-pretreated control; B+, benzonase digestion.

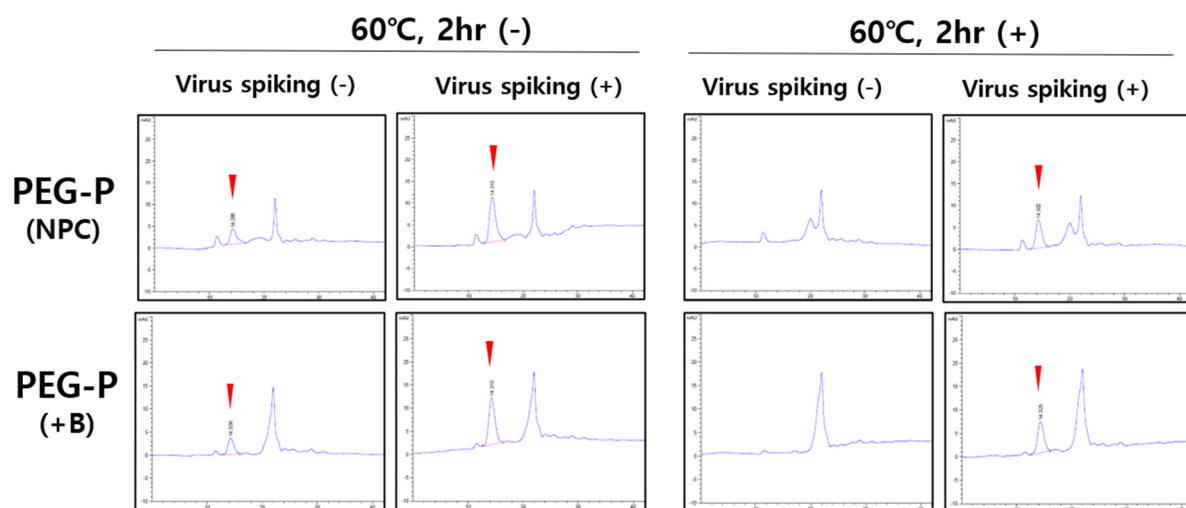

**Fig. S6. Representative original chromatograms drawn by SE- HPLC of PEG-P (1×) with or without spiked 146S antigens. Red arrowheads indicate the FMDV 146S antigen peaks.**

Abbreviations: PEG-P, polyethylene glycol-precipitate; SE-HPLC, size-exclusion high-performance liquid chromatography; NPC, non-pretreated control; B+, benzonase digestion.
